# Supplementary material for: Evolutionary interactions between haemagglutinin and neuraminidase in avian influenza
Source: PubMed Central journal article supplement (PMC3854068; doi:10.1186/1471-2148-13-222), 2013-10-09
Supplement: 1471-2148-13-222-S1.pdf [file 1471-2148-13-222-S1.pdf]

| H7 HA1 Site (H3 numbering) | H7N1 | H7N2 | H7N3 | H7N7 |
|----------------------------|------|------|------|------|
| -17                        |      | X    |      |      |
| -16                        |      | X    | X    | X    |
| -15                        |      |      | X    | X    |
| 22                         | X    |      |      |      |
| 27                         |      |      | X    |      |
| 28                         |      | X    |      |      |
| 30                         |      |      | X    |      |
| 31                         |      |      | X    |      |
| 56                         |      | X    |      |      |
| 64                         | X    |      |      |      |
| 69                         | X    |      |      |      |
| 71                         |      | X    |      | X    |
| 77                         | X    |      |      |      |
| 123                        | X    | X    |      |      |
| 135                        | X    | X    |      |      |
| 137                        |      | X    |      | X    |
| 151                        | X    | X    |      |      |
| 184                        |      | X    |      |      |
| 190                        |      | X    |      |      |
| 193                        |      |      | X    |      |
| 201                        | X    |      |      |      |
| 203                        |      | X    |      |      |
| 216                        |      | X    |      | X    |
| 218                        | X    | X    | X    | X    |
| 242                        |      | X    |      |      |
| 255                        | X    | X    |      |      |
| 270                        |      | X    | X    | X    |
| 277                        |      | X    |      |      |
| 284                        |      | X    |      | X    |
| 290                        | X    |      |      |      |
| 300                        | X    | X    |      |      |
| 304                        | X    | X    | X    |      |
| 308                        |      | X    |      |      |
| 322                        |      | X    |      |      |

**Table S1: H7 HA1 sites with  $d_N/d_S > 1$  in stochastic mutational analysis on different NA subtype backgrounds.**

The  $d_N$  value for each site was divided by the average  $d_S$  across all sites for that subtype to obtain a  $d_N/d_S$  value for each site on each background NA subtype. Sites with  $d_N/d_S > 1$ , i.e. under putative positive selection, are reported in the table (denoted “X”). As is influenza convention, sites are numbered according to the H3 numbering for HA1 (positive sites numbers) and the peptide signal region (negative site numbers). Site numbers are coloured according to the domain: fusion (pink), vestigial esterase (green) or receptor binding (blue) following Yang *et al.* (2010) *PLoS Path.*

| <b>Avian taxonomic order</b> | <b>Hosts in avian H7 HA dataset</b>                           |
|------------------------------|---------------------------------------------------------------|
| Anseriformes                 | Duck, goose, swan, teal, widgeon                              |
| Galliformes                  | Turkey, grouse, chicken, quail, pheasant, guinea-fowl, chukar |
| Struthioniformes             | Ostrich, emu                                                  |
| Passeriformes                | Starling, fairy bluebird, common iora                         |
| Pstittaciformes              | Parrot, parakeet, conure, macaw                               |
| Charadriiformes              | Gull, ruddy turnstone, shorebird/wader, red knot              |
| Rheiformes                   | Rhea                                                          |

**Table S2: Classification of avian hosts of H7 influenza virus by taxonomic order.**

The right-hand column lists the names of birds of a particular taxonomic order for which an isolate was present in the avian H7 HA sequence dataset.

|                                          |          |                                       |          |
|------------------------------------------|----------|---------------------------------------|----------|
| 1_h7n1_duck_mongolia_47_01               | AB268557 | 51_h7n1_turkey_italy_3489_1999        | CY025157 |
| 2_h7n1_afristar_engq_938_79              | AF149295 | 52_h7n1_turkey_italy_3560_1999        | CY025165 |
| 3_h7n1_commoniora_singapore_f89_95       | AF202228 | 53_h7n1_turkey_italy_2715_1999        | CY025173 |
| 4_h7n1_fairybluebird_singapore_f92_94    | AF202229 | 54_h7n1_turkey_italy_2732_1999        | CY025181 |
| 5_h7n1_africanstarling_englandq_983_79   | AF202232 | 55_h7n1_turkey_italy_1265_1999        | CY025189 |
| 6_h7n1_ostrich_zimbabwe_222_96           | AF202234 | 56_h7n1_duck_hongkong_301_72          | DQ003216 |
| 7_h7n1_chicken_england_71_82             | AF202236 | 57_h7n1_ostrich_italy_2332_00         | DQ991312 |
| 8_h7n1_fpv_egypt_45                      | AF202237 | 58_h7n1_ostrich_italy_984_00          | DQ991343 |
| 9_h7n1_conure_england_1234_94            | AF202241 | 59_h7n1_rhea_northcarolina_39482_1993 | EF470586 |
| 10_h7n1_parrot_england_1174_94           | AF202243 | 60_h7n1_mallard_italy_250_02          | EU158105 |
| 11_h7n1_ostrich_southafrica_1069_91      | AF202244 | 61_h7n1_fpv_rostock_1934              | M24457   |
| 12_h7n1_conure_england_766_94            | AF202249 | 62_h7n1_ts1_1_a_fpv_rostock_1934      | M24458   |
| 13_h7n1_parakeet_netherlands_267497_94   | AF202251 | 1_h7n2_duck_hongkong_301_1978         | AB302789 |
| 14_h7n1_parrot_northernireland_vf7367_73 | AF202252 | 2_h7n2_chicken_newyork_131425_94      | AF072384 |
| 15_h7n1_turkey_italy_12598_99            | AJ489520 | 3_h7n2_turkey_newyork_44505_94        | AF072386 |
| 16_h7n1_chicken_italy_13489_99           | AJ493214 | 4_h7n2_chicken_newyork_138337_95      | AF072388 |
| 17_h7n1_chicken_italy_267_00             | AJ493215 | 5_h7n2_chicken_newyork_80302_96       | AF072393 |
| 18_h7n1_turkey_italy_3889_99             | AJ493466 | 6_h7n2_chicken_pennsylvania_117671_97 | AF072395 |
| 19_h7n1_turkey_italy_4169_99             | AJ493468 | 7_h7n2_chicken_newyork_67773_97       | AF072396 |
| 20_h7n1_chicken_italy_4575_99            | AJ493469 | 8_h7n2_turkey_pennsylvania_7975_97    | AF072397 |
| 21_h7n1_turkey_italy_4602_99             | AJ493470 | 9_h7n2_chicken_pennsylvania_135521_98 | AF072398 |
| 22_h7n1_turkey_italy_4603_99             | AJ493471 | 10_h7n2_quail_newyork_1398951_98      | AF072399 |
| 23_h7n1_turkey_italy_3775_99             | AJ493472 | 11_h7n2_turkey_israel_ramon_79        | AF202235 |
| 24_h7n1_chicken_italy_445_99             | AJ580353 | 12_h7n2_psittacine_italy_1_91         | AF202242 |
| 25_h7n1_chicken_italy_1067_99            | AJ584647 | 13_h7n2_gull_italy_6922_93            | AF202248 |
| 26_h7n1_mallard_alberta_34_2001          | CY005983 | 14_h7n2_avian_ny_1183531_2001         | AY240877 |
| 27_h7n1_turkey_italy_4169_1999           | CY006037 | 15_h7n2_avian_ny_7041112_00           | AY240878 |
| 28_h7n1_duck_nanchang_1904_1992          | CY014612 | 16_h7n2_avian_ny_742112_00            | AY240879 |
| 29_h7n1_chicken_italy_1285_2000          | CY015014 | 17_h7n2_avian_ny_762473_00            | AY240880 |
| 30_h7n1_turkey_italy_3675_1999           | CY021413 | 18_h7n2_avian_ny_817465_00            | AY240881 |
| 31_h7n1_turkey_italy_1351_2001           | CY021421 | 19_h7n2_avian_ny_77296_00             | AY240882 |
| 32_h7n1_turkey_italy_2984_2000           | CY021533 | 20_h7n2_chicken_fl_903484_01          | AY240883 |
| 33_h7n1_turkey_italy_4426_2000           | CY021541 | 21_h7n2_chicken_nj_1188785_01         | AY240884 |
| 34_h7n1_chicken_italy_322_2001           | CY021549 | 22_h7n2_chicken_nj_1503837_02         | AY240885 |
| 35_h7n1_duck_italy_551_2000              | CY021557 | 23_h7n2_chicken_nj_15124418_02        | AY240886 |
| 36_h7n1_guineafowl_italy_155_2000        | CY022661 | 24_h7n2_chicken_nj_158149_99          | AY240887 |
| 37_h7n1_quail_italy_396_2000             | CY022669 | 25_h7n2_chicken_nj_608_02             | AY240888 |
| 38_h7n1_chicken_italy_1082_1999          | CY022677 | 26_h7n2_chicken_ny_1190557_01         | AY240890 |
| 39_h7n1_turkey_italy_977_1999            | CY024754 | 27_h7n2_chicken_ny_1192567_01         | AY240891 |
| 40_h7n1_chicken_italy_2335_2000          | CY024762 | 28_h7n2_chicken_ny_13878_98           | AY240893 |
| 41_h7n1_turkey_italy_1084_2000           | CY024770 | 29_h7n2_chicken_ny_215868_99          | AY240895 |
| 42_h7n1_turkey_italy_4708_1999           | CY024858 | 30_h7n2_chicken_ny_224094_99          | AY240896 |
| 43_h7n1_turkey_italy_4295_1999           | CY024874 | 31_h7n2_chicken_ny_307493_00          | AY240897 |
| 44_h7n1_turkey_italy_3488_1999           | CY024890 | 32_h7n2_chicken_pa_1490921_02         | AY240900 |
| 45_h7n1_pekinduck_italy_1848_2000        | CY024898 | 33_h7n2_chicken_va_32_02              | AY240906 |
| 46_h7n1_turkey_italy_4644_1999           | CY025109 | 34_h7n2_chicken_ny_1485812_99         | AY240907 |
| 47_h7n1_quail_italy_4992_1999            | CY025117 | 35_h7n2_guineafowl_ma_14808111_02     | AY240908 |

|                                          |          |                                          |          |
|------------------------------------------|----------|------------------------------------------|----------|
| 48_h7n1_turkey_italy_4294_1999           | CY025133 | 36_h7n2_guineafowl_nj_132469_98          | AY240909 |
| 49_h7n1_turkey_italy_4617_1999           | CY025141 | 37_h7n2_turkey_nc_11165_02               | AY240910 |
| 50_h7n1_turkey_italy_4301_1999           | CY025149 | 38_h7n2_turkey_va_55_02                  | AY240912 |
| 39_h7n2_turkey_va_66_02                  | AY240913 | 14_h7n3_turkey_england_63                | U20462   |
| 40_h7n2_turkey_va_67_02                  | AY240914 | 15_h7n3_turkey_italy_3620_2003           | CY021357 |
| 41_h7n2_chicken_nj_17206_99              | AY240915 | 16_h7n3_turkey_italy_1010_2003           | CY021365 |
| 42_h7n2_chicken_newjersey_20621_99       | AY240916 | 17_h7n3_mallard_delaware_418_2005        | CY021637 |
| 43_h7n2_chicken_ny_3572_98               | AY240917 | 18_h7n3_turkey_utah_2472110_1995         | EF470585 |
| 44_h7n2_chicken_nj_15827_99              | AY240918 | 19_h7n3_chicken_britishcolumbia_cn7_2004 | EF470587 |
| 45_h7n2_chicken_ny_13986_99              | AY240919 | 20_h7n3_mallardduck_alb_279_1977         | CY005976 |
| 46_h7n2_chicken_ny_341733_99             | AY240920 | 21_h7n3_shorebird_delaware_22_06         | EU030968 |
| 47_h7n2_chicken_ny_147142_1999           | AY240921 | 22_h7n3_laughinggull_delaware_42_06      | EU030984 |
| 48_h7n2_goose_newjersey_86003_98         | AY240922 | 23_h7n3_turkey_italy_9742_2002           | CY028660 |
| 49_h7n2_quail_ny_11430_99                | AY240923 | 24_h7n3_turkey_italy_3829_2004           | CY028676 |
| 50_h7n2_quail_pa_20304_98                | AY240924 | 25_h7n3_gsc_chicken_b_britishcolumbia_04 | AY611524 |
| 51_h7n2_avian_ny_730636_00               | AY240925 | 26_h7n3_chicken_chile_1842404322_2002    | CY015027 |
| 52_h7n2_chicken_hebei_1_2002             | AY724257 | 27_h7n3_chicken_england_4054_2006        | EF467826 |
| 53_h7n2_chicken_de_hobo_2004             | AY831668 | 28_h7n3_turkey_italy_4479_2004           | CY020581 |
| 54_h7n2_chicken_de_viva_2004             | AY831669 | 29_h7n3_turkey_italy_4608_2003           | CY021485 |
| 55_h7n2_chicken_md_minhma_2004           | AY831670 | 30_h7n3_turkey_italy_2043_2003           | CY022613 |
| 56_h7n2_dk_hongkong_293_1978             | CY006029 | 31_h7n3_chicken_chile_176822_02          | AY303630 |
| 57_h7n2_chicken_pennsylvania_143586_2002 | CY014896 | 32_h7n3_cinnamonteal_bolivia_4537_2001   | DQ525411 |
| 58_h7n2_quail_italy_4610_2003            | CY021509 | 33_h7n3_turkey_italy_8000_2002           | CY024738 |
| 59_h7n2_chukar_newyork_116531_2005       | CY022765 | 34_h7n3_guineafowl_italy_266184_02       | EU158110 |
| 60_h7n2_chicken_newyork_16330_2005       | CY022821 | 35_h7n3_mallard_italy_199_01             | EU158109 |
| 61_h7n2_chicken_newyork_212112_2005      | CY022829 | 36_h7n3_turkey_england_192328_79         | AF202245 |
| 62_h7n2_duck_newyork_212116_2005         | CY022845 | 37_h7n3_turkey_oregon_1971               | DQ870894 |
| 63_h7n2_chicken_newyork_212111_2005      | CY024834 | 38_h7n3_turkey_oregon_1971               | AB269693 |
| 64_h7n2_chukar_newyork_212117_2005       | CY024842 | 39_h7n3_widgeon_alb_284_1977             | CY005975 |
| 65_h7n2_duck_newyork_1436465_2005        | CY028523 | 40_h7n3_blackduck_ohio_415_2001          | CY020885 |
| 66_h7n2_chicken_newyork_31815_2006       | CY028540 | 41_h7n3_turkey_italy_4130_2004           | CY029913 |
| 67_h7n2_guineafowl_newyork_83911_2006    | CY028572 | 42_h7n3_chicken_pakistan_34669_1995      | CY015033 |
| 68_h7n2_chicken_newyork_83912_2006       | CY028580 | 43_h7n3_turkey_italy_5425_2007           | EU391536 |
| 69_h7n2_guineafowl_newyork_195014_2006   | CY028596 | 44_h7n3_turkey_england_63                | AF202238 |
| 70_h7n2_chicken_newyork_290474_2006      | CY028628 | 45_h7n3_chicken_chile_4977_02            | AY303634 |
| 71_h7n2_chicken_newyork_163264_2005      | CY029833 | 46_h7n3_turkey_chile_4418_02             | AY303635 |
| 72_h7n2_chicken_ny_31815_06              | DQ873807 | 47_h7n3_turkey_italy_2987_2003           | CY021493 |
| 73_h7n2_guineafowl_ny_464918_2006        | DQ907528 | 48_h7n3_turkey_italy_3337_2004           | CY021501 |
| 74_h7n2_chicken_wales_1306_2007          | EF675618 | 49_h7n3_chicken_queensland_1994          | CY022685 |
| 75_h7n2_duck_hongkong_293_78             | U20461   | 50_h7n3_chicken_newyork_1227311_1999     | AY240892 |
| 1_h7n3_chicken_newyork_147149_1999       | AY240894 | 51_h7n3_mallard_italy_33_01              | AY586411 |
| 2_h7n3_turkey_england_1963               | CY015065 | 52_h7n3_chicken_britishcolumbia_04       | AY611524 |
| 3_h7n3_turkey_italy_8912_2002            | CY020605 | 53_h7n3_greenwingedteal_alb_228_1985     | CY005978 |
| 4_h7n3_chicken_pakistan_447_95           | AF202226 | 54_h7n3_mallardduck_alberta_435_1985     | CY014587 |
| 5_h7n3_chicken_victoria_1_92             | AF202227 | 55_h7n3_turkey_italy_2685_2003           | CY028668 |
| 6_h7n3_chicken_pakistan_cr2_95           | AF202230 | 56_h7n3_turkey_italy_3477_2004           | CY028684 |
| 7_h7n3_chicken_queensland_667_95         | AF202231 | 57_h7n3_turkey_oregon_1971               | DQ870888 |
| 8_h7n3_chicken_chile_4957_02             | AY303632 | 58_h7n3_turkey_tennessee_1_79            | AB269692 |

|                                                |          |                                         |          |
|------------------------------------------------|----------|-----------------------------------------|----------|
| 9_h7n3_chicken_chile_4968_02                   | AY303633 | 59_h7n3_turkey_oregon_1971              | M31689   |
| 10_h7n3_mallard_netherlands_12_2000            | CY014718 | 60_h7n3_ruddyturnstone_nj_65_1985       | CY005928 |
| 11_h7n3_turkey_minnesota_1200_1980             | CY014778 | 61_h7n3_chicken_england_4266_2006       | EF467825 |
| 12_h7n3_mallard_ohio_322_1998                  | CY016188 | 62_h7n3_turkey_italy_251_2003           | CY020589 |
| 13_h7n3_bluewingedteal_ohio_658_2004           | CY018901 | 63_h7n3_chicken_chile_4322_02           | AY303631 |
| 64_h7n3_chicken_britishcolumbia_gsc_human_b_04 | AY646078 | 22_h7n7_mallard_sweden_103_02           | AY999987 |
| 65_h7n3_mallard_alberta_24_01                  | DQ017504 | 23_h7n7_mallard_sweden_104_02           | AY999988 |
| 66_h7n3_mallard_alberta_24_01                  | DQ017513 | 24_h7n7_mallard_sweden_105_02           | AY999989 |
| 67_h7n3_pheasant_minnesota_917_1980            | CY014721 | 25_h7n7_mallard_sweden_106_02           | AY999990 |
| 68_h7n3_chicken_victoria_224_1992              | CY025077 | 26_h7n7_mallard_sweden_107_02           | AY999991 |
| 69_h7n3_chicken_italy_270638_02                | EU158111 | 27_h7n7_ruddyturnstone_de_2378_1988     | CY005980 |
| 1_h7n7_duck_taiwan_33_1993                     | AB297923 | 28_h7n7_redknot_nj_325_1989             | CY005981 |
| 2_h7n7_duck_taiwan_ya103_1993                  | AB297925 | 29_h7n7_fowl_dobson_1927                | CY014992 |
| 3_h7n7_turkey_ireland_pv74_1995                | AF028021 | 30_h7n7_starling_victoria_1985          | CY024778 |
| 4_h7n7_nonpsittacine_englandq_1985_89          | AF202240 | 31_h7n7_chicken_victoria_1976           | CY024786 |
| 5_h7n7_turkey_northernireland_vf1545c5_98      | AF202246 | 32_h7n7_chicken_victoria_1_1985         | CY025069 |
| 6_h7n7_turkey_england_647_77                   | AF202247 | 33_h7n7_chicken_netherlands_03010132_03 | EF015551 |
| 7_h7n7_macaw_england_626_80                    | AF202250 | 34_h7n7_mallard_italy_299_05            | EU158104 |
| 8_h7n7_ostrich_southafrica_m320_96             | AF202253 | 35_h7n7_duck_jiangxi_1742_03            | EU158108 |
| 9_h7n7_chicken_germany_r28_03                  | AJ620350 | 36_h7n7_fpv_weybridge                   | L37794   |
| 10_h7n7_netherlands_127_03                     | AY338455 | 37_h7n7_goose_leipzig_137_8_1979        | L43913   |
| 11_h7n7_chicken_netherlands_1_03               | AY338458 | 38_h7n7_goose_leipzig_187_7_1979        | L43914   |
| 12_h7n7_netherlands_219_03                     | AY338459 | 39_h7n7_goose_leipzig_192_7_1979        | L43915   |
| 13_h7n7_mallard_sweden_56_02                   | AY999977 | 40_h7n7_chicken_victoria_1_1985         | M17735   |
| 14_h7n7_mallard_sweden_82_02                   | AY999978 | 41_h7n7_starling_victoria_1_1985        | M17736   |
| 15_h7n7_mallard_sweden_85_02                   | AY999979 | 42_h7n7_chicken_leipzig_79              | U20459   |
| 16_h7n7_mallard_sweden_87_02                   | AY999980 | 43_h7n7_duck_heinersdorf_s495_6_86      | U20465   |
| 17_h7n7_mallard_sweden_92_02                   | AY999982 | 44_h7n7_chicken_jena_1816_87            | U20469   |
| 18_h7n7_mallard_sweden_93_02                   | AY999983 | 45_h7n7_fpv_dutch_27                    | Z12617   |
| 19_h7n7_mallard_sweden_94_02                   | AY999984 | 46_h7n7_chicken_ireland_1733_89         | AF202239 |
| 20_h7n7_mallard_sweden_100_02                  | AY999985 | 47_h7n7_chicken_victoria_75             | Z47199   |
| 21_h7n7_mallard_sweden_102_02                  | AY999986 |                                         |          |

**Table S3: H7 avian influenza sequence dataset.**

GenBank accession numbers are provided (Note: only the HA1 sub-segment of the influenza HA was used for the phylogenetic and mutational mapping analyses. Identical sequences and early European sequences sampled between 1927 and 1945 were excluded from the mutational mapping analyses). Sequence names were re-formatted for compatibility with sequence analysis software. Sequences were downloaded from the NCBI influenza virus resource:

(<http://www.ncbi.nlm.nih.gov/genomes/FLU/Database/>)

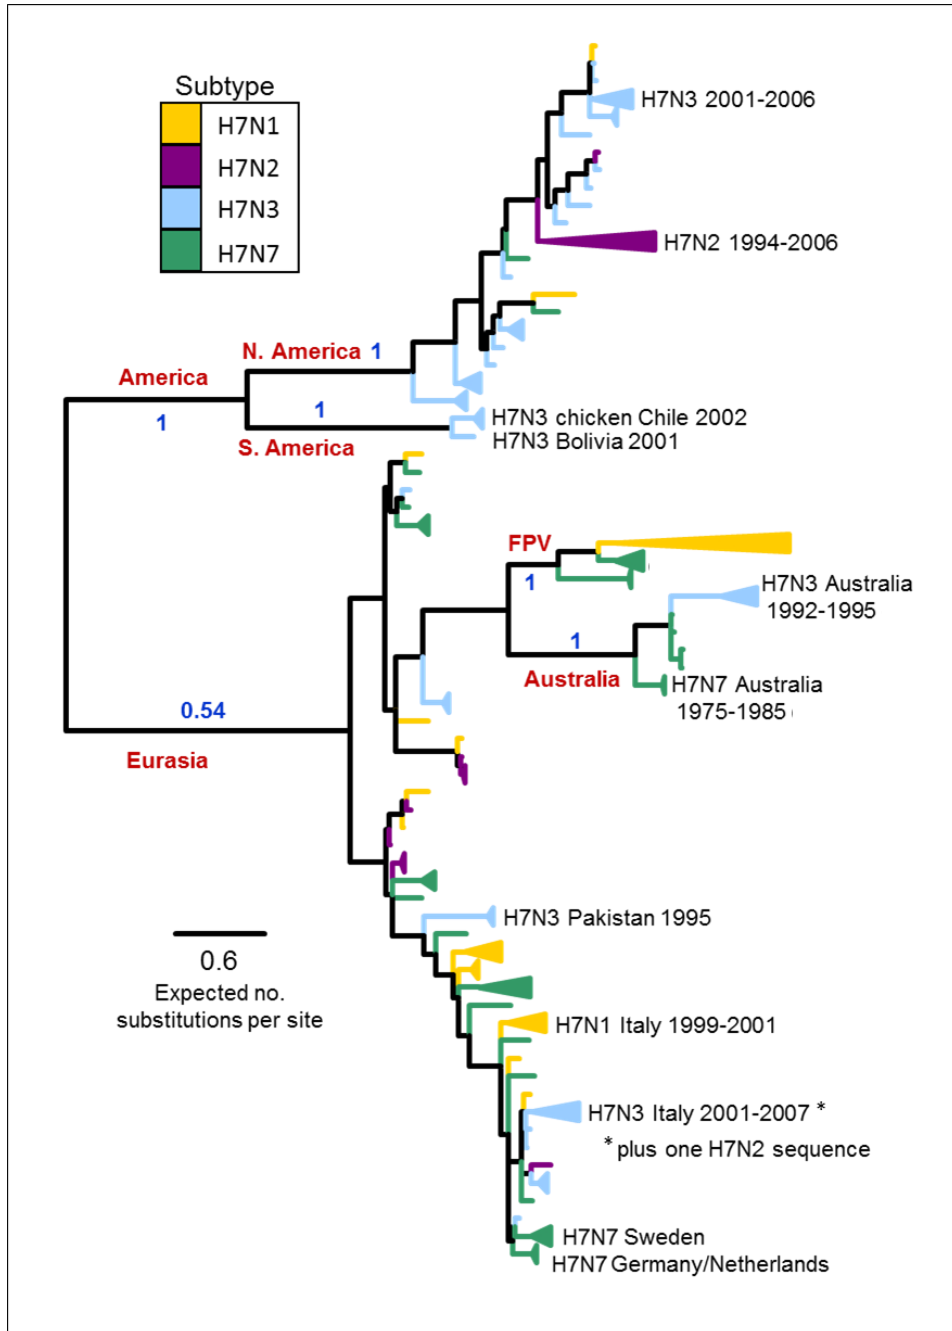

**Figure S1**

**H7 HA1 MrBayes consensus phylogeny.** The tree was inferred under the GTR +  $\Gamma$  model of DNA substitution, with 6 rate categories, and constructed from 1000 post-burnin MCMC phylogeny samples from MrBayes. Major geographical lineages are labelled in red and posterior probabilities of clades are labelled in blue. An H15 sequence was used as an outgroup, but was removed in this figure for the purpose of presentation. Lineages are coloured by the background NA subtype of the virus at the tips of the tree, and clades of sequences of the same subtype have been collapsed for the purpose of presentation. Note: FPV = 'fowl plague virus', a term used to describe H7 avian influenza viruses isolated in the 1920s-1940s.

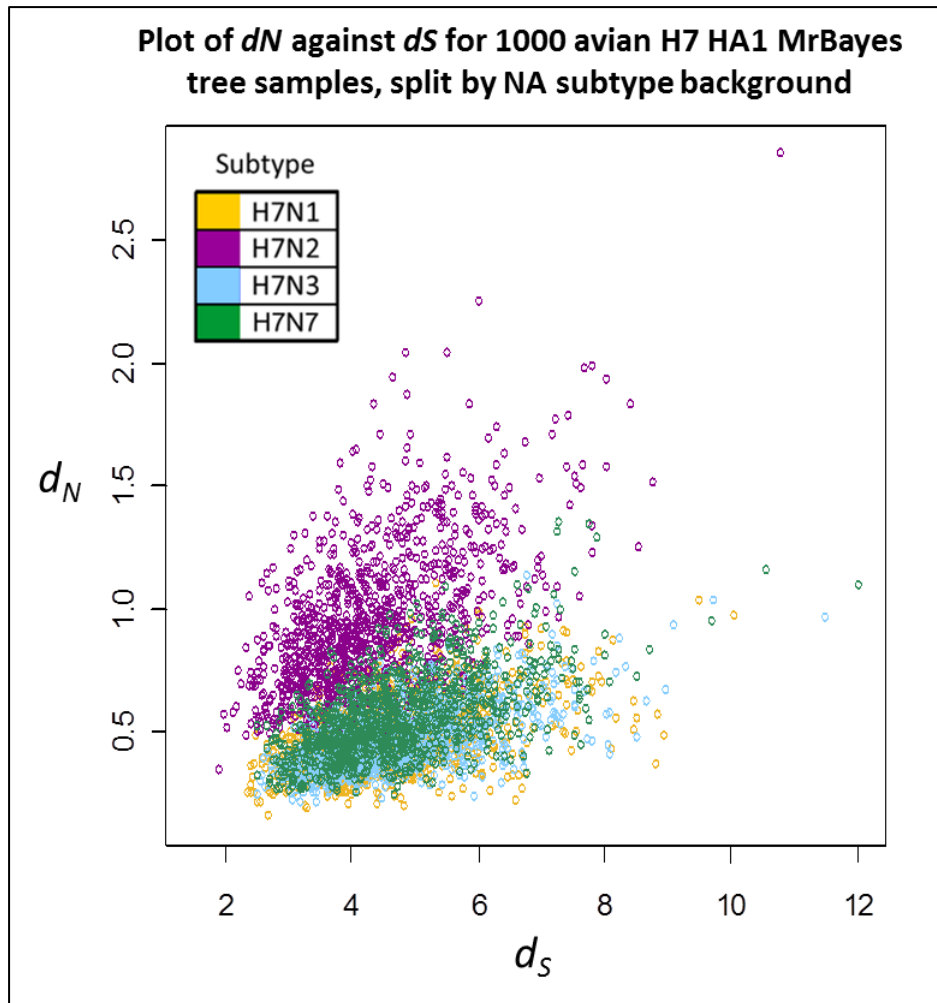

**Figure S2**

**The rate of non-synonymous substitution ( $d_N$ ) plotted against the rate of synonymous substitution ( $d_S$ ) for avian influenza H7 HA1 from viruses with different background NA subtypes.** For each of the 1000 MCMC tree samples from MrBayes, the value of  $d_N$  was plotted against the value of  $d_S$  for H7N1, H7N2, H7N3 and H7N7, so that the rates for different subtypes could be directly compared. It may be observed that, whilst the  $d_S$  values were similar for all four subtypes, there was little overlap between the H7N2  $d_N$  values and those for the other subtypes. For each subtype, the linear regression line for the  $d_N$  value for a tree sample against the  $d_S$  value for the tree sample is shown.

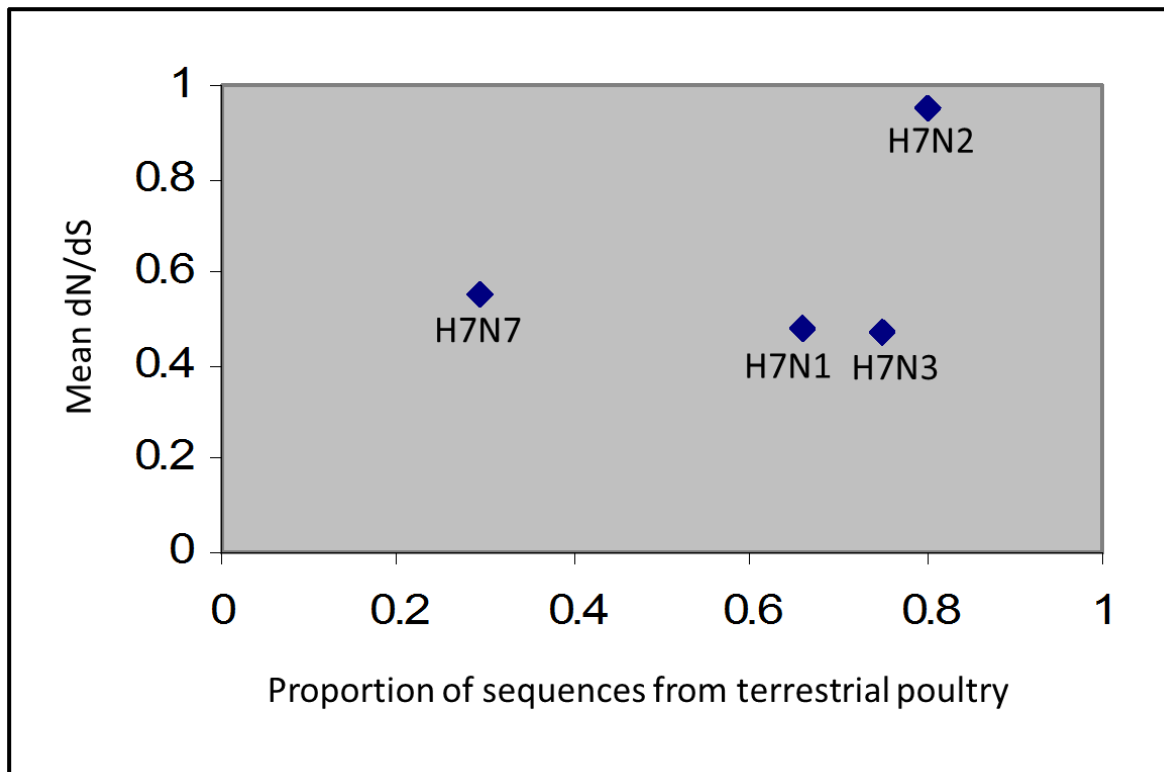

**Figure S3**

**Relationship between proportion of sequences from terrestrial poultry (Galliformes) and mean  $d_N/d_S$  for each background NA subtype.** For each background NA subtype, the proportion of sequences in the dataset which were from terrestrial poultry was plotted against the mean  $d_N/d_S$  for H7 avian influenza HA1, inferred by stochastic mutational mapping. A Spearman's rank correlation test did not indicate a significant correlation between  $d_N/d_S$  and proportion of sequences from terrestrial poultry ( $p = 0.9167$ ).



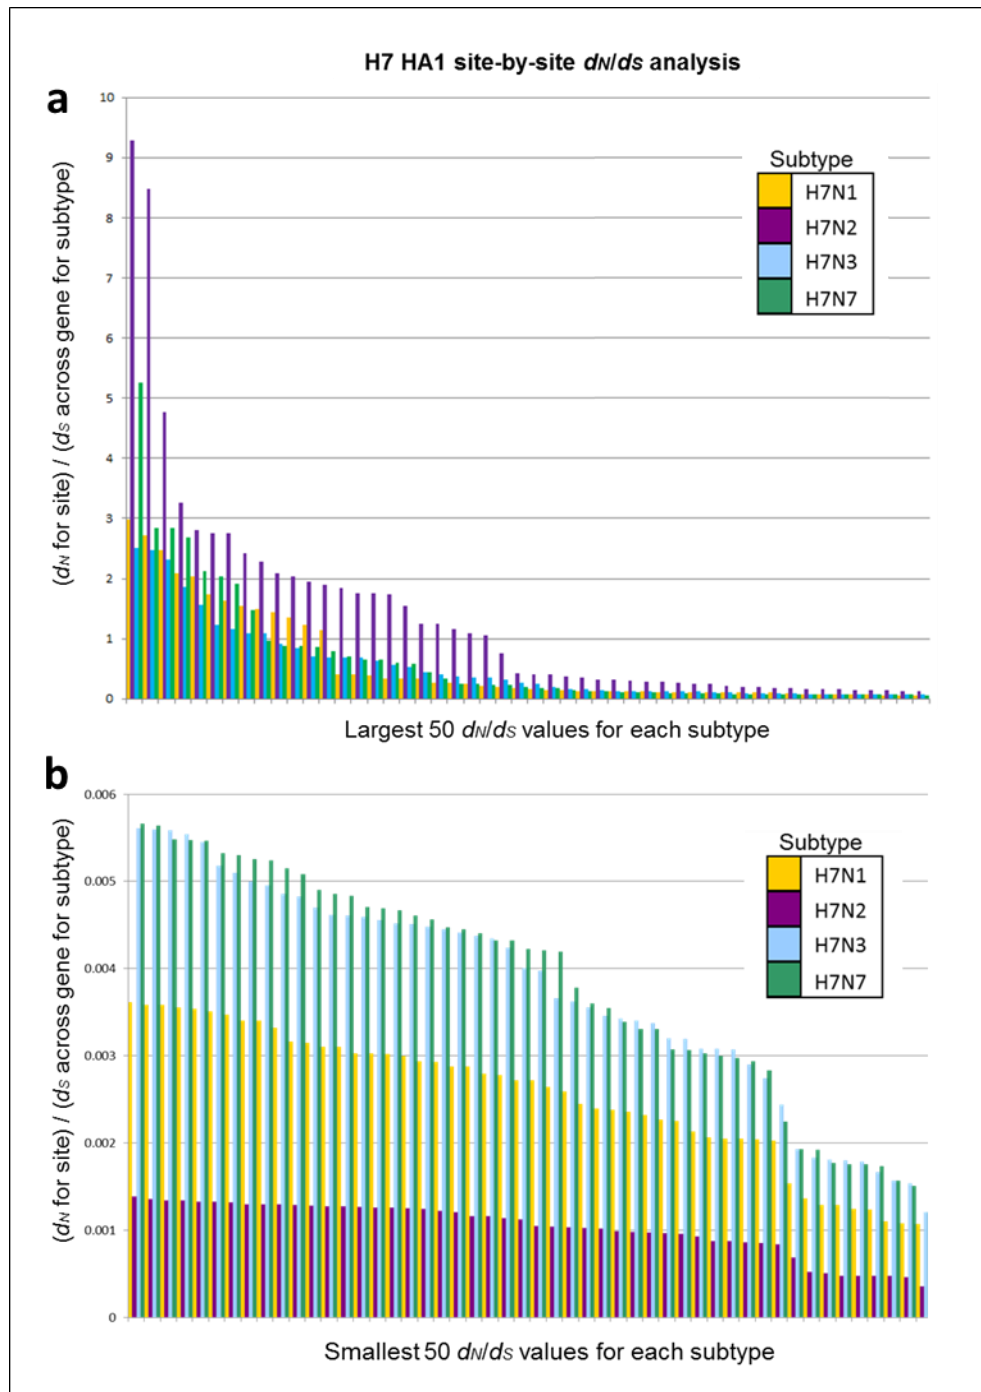

**Figure S4**

**Site-by-site  $d_N/d_S$  values across the avian influenza H7 HA1, ranked by size.** For each NA background subtype, the  $d_N$  value for each site was divided by the average  $d_S$  across all sites for that subtype. The site-by-site  $d_N/d_S$  values were ranked by size: (a) the largest 50 values were plotted for each subtype and (b) the smallest 50 values were plotted for each subtype. For all of the largest 50  $d_N/d_S$  values,  $d_N/d_S$  on the N2 NA background was larger than the values of the same rank on the N1, N3 or N7 NA backgrounds. For all of the smallest 50  $d_N/d_S$  values for the H7 HA1 sites, the value of  $d_N/d_S$  on the N2 NA background was smaller than the values of the same rank on the N1, N3 or N7 NA backgrounds.

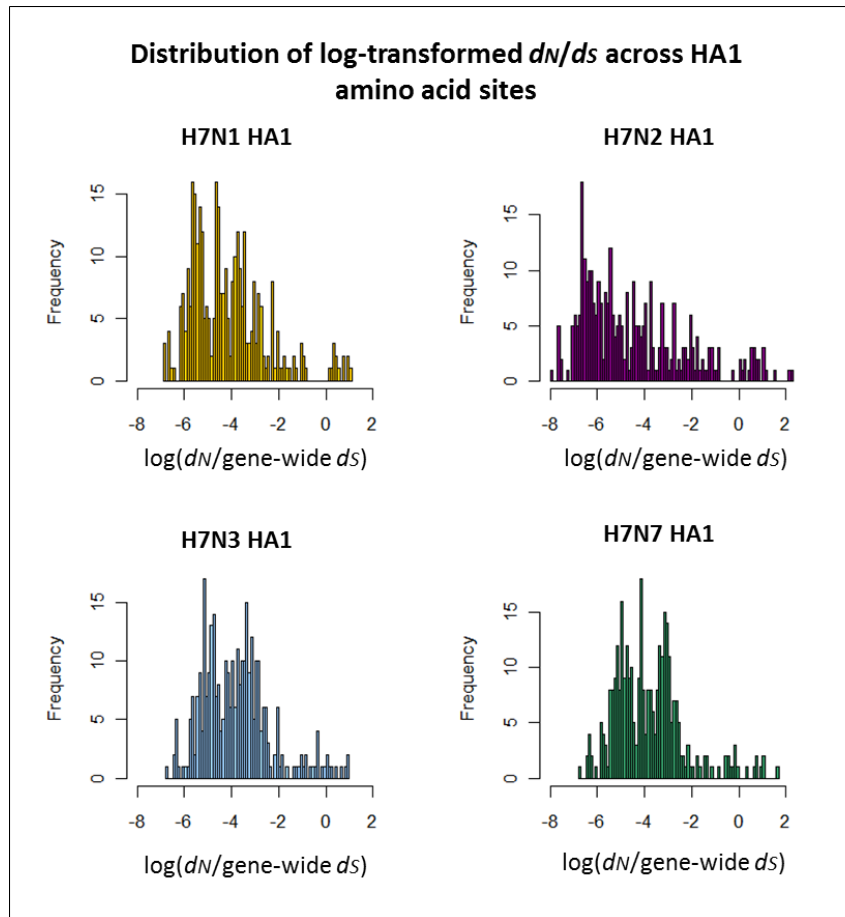

**Figure S5**

**Histograms showing frequency of different  $\log(d_N/\text{gene-wide } d_S)$  values across the H7 HA1 alignment for H7N1, H7N2, H7N3 and H7N7 lineages.** Sites with  $\log(d_N/d_S) > 0$  correspond to  $d_N/d_S > 1$ , and sites with  $\log(d_N/d_S) < 0$  correspond to  $d_N/d_S < 1$ . H7N2 was the only subtype for which  $\log(d_N/d_S)$  values less than -7, or greater than 2, was observed.

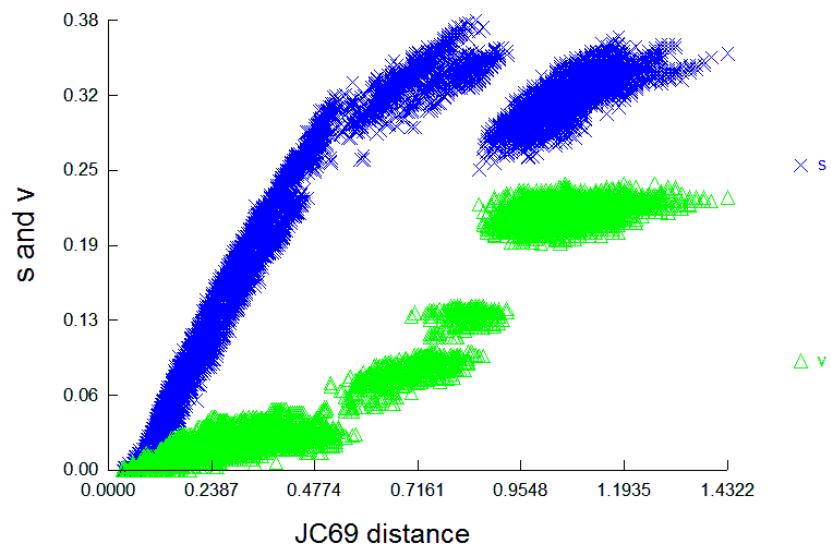

**Figure S6**

**Plot of transitions (s) and transversions (v) against genetic distance for H7 HA dataset.** Although some saturation was observed at higher genetic distances, the number of transitions remains higher than the number of transversions at all genetic distances.

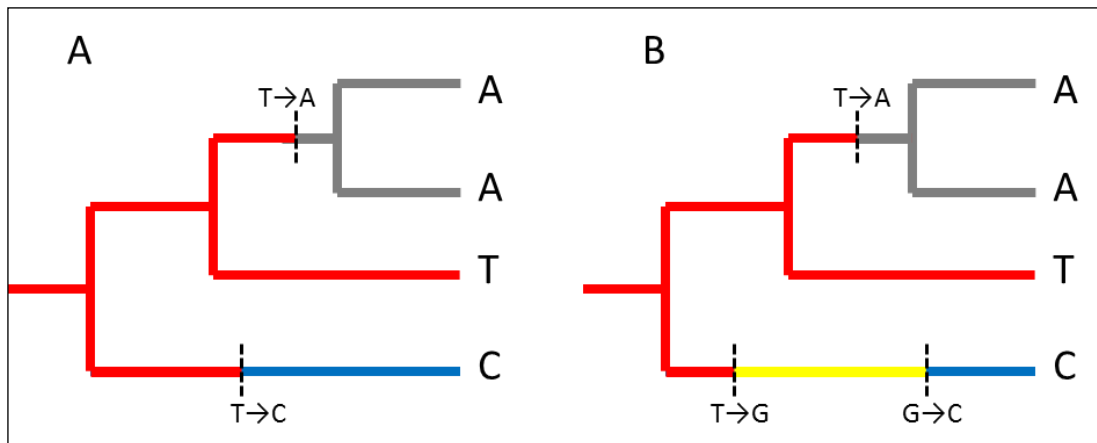

**Figure S7**

**Example nucleotide mutational maps.** Stochastic mutational mapping is used to infer mutational histories for nucleotide sites. Mutational histories report the nature and location of molecular changes along a phylogeny. Multiple mutational mappings may be sampled for each site. For example, maps (A) and (B) are both valid reconstructions for the observed pattern of variation.

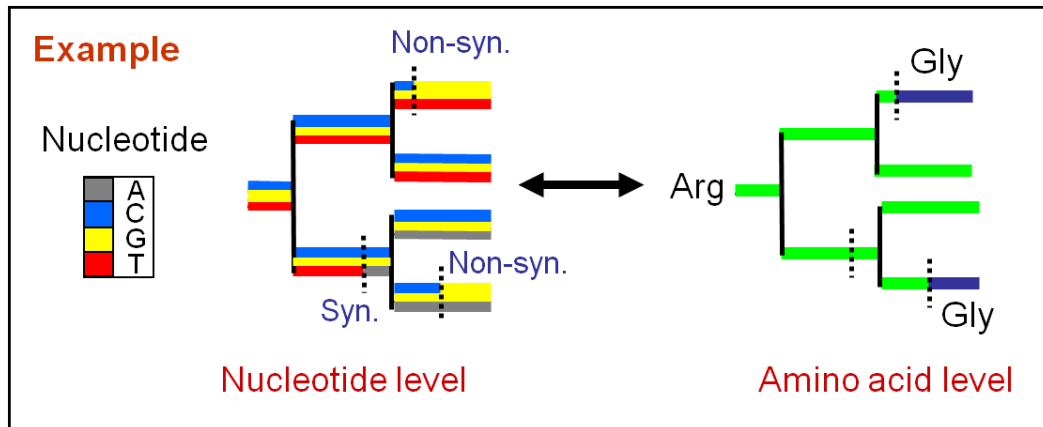

**Figure S8**

**Example codon map obtained using stochastic mutational mapping.** For each codon site, the first and second codon position nucleotide maps for a site were rescaled to the branch lengths of the third position map and combined to produce a map at the amino-acid level. Nucleotide changes could then be labelled as synonymous or non-synonymous for calculating  $d_N$ ,  $d_S$  and  $d_N/d_S$ . In this example there are three nucleotide changes, one of which is synonymous (CGT → CGA) and two of which are non-synonymous (CGT → GGT and CGA → GGA).

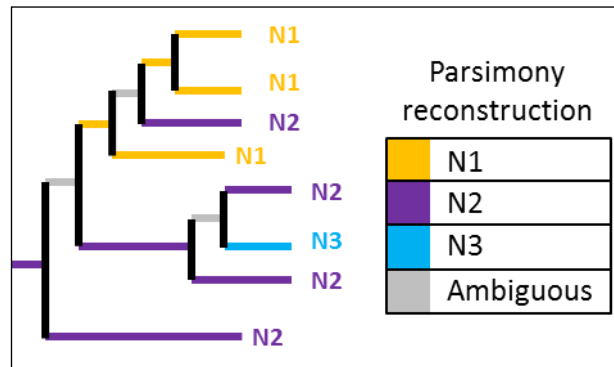

**Figure S9**

**Example parsimony reconstruction of background NA subtypes on a phylogeny of H7 HA sequences.** Branches are coloured according to the inferred ancestral subtype of the node immediately preceding them towards the tips of the tree. A single-pass algorithm was implemented, which labels some branches as 'ambiguous'. This avoids the problem associated with erroneous assignment of subtypes in the subsequent calculation of evolutionary rates along branches associated with a particular NA subtype.

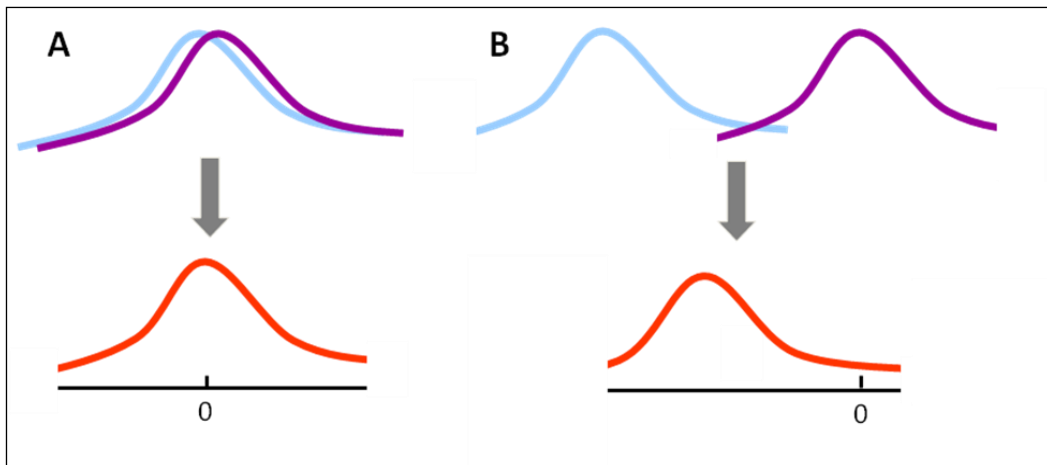

**Figure S10**

**Testing for differences between posterior distributions of evolutionary rates for different NA background subtypes. (A)** When the location of the distributions (examples shown here in blue and purple) is very similar, the distribution of differences of randomised pairings between them (shown in red) will be roughly centred on zero. **(B)** When the distributions differ in their location, the distribution of differences between randomised pairings will be skewed, with zero at one of the tail ends. The proportion of pairings lying to each side of zero thus provides a measure of the difference in location of the distributions.
